# Supplementary material for: An efficient dual functional Raman and Fluorescence detection platform achieved by controlling the electromagnetic enhanced field in three-dimensional Ag/ZnO composited arrays
Source: Royal Society of Chemistry journal article supplement (doi:10.1039/d2ma00368f), 2022-01-01
Supplement: d2ma00368f1.pdf [file d2ma00368f1.pdf]

## Supporting Information

### **Efficient Dual Functional Raman and Fluorescence Detection Platform Achieved by Controlling Electromagnetic Enhanced Field in Three-dimensional Ag/ZnO Compositd Arrays**

Yongqi Yin<sup>a,b\*</sup>, Xiao Liu<sup>b,c</sup>, Mengqi Wang<sup>a</sup>, Shuang Li<sup>a</sup>, Yan Chen<sup>a</sup>, Ye Sun<sup>d\*</sup>.

<sup>a</sup> *Key Laboratory for Photonic and Electronic Bandgap Materials, Ministry of Education, School of Physics and Electronic Engineering, Harbin Normal University, Harbin, 150025, China*

<sup>b</sup> *Condensed Matter Science and Technology Institute, Harbin Institute of Technology, Harbin, 150080, China*

<sup>c</sup> *Special Division of Environmental and Energy Science, Komaba Organization for Educational Excellence (KOMEX), College of Arts and Sciences, University of Tokyo, Tokyo 153-8902, Japan*

<sup>d</sup> *School of Instrumentation Science and Engineering, Harbin Institute of Technology, Harbin 150080, China*

\*Corresponding authors. E-mail addresses: echo.929@163.com (Y. Yin), sunye@hit.edu.cn (Y. Sun)

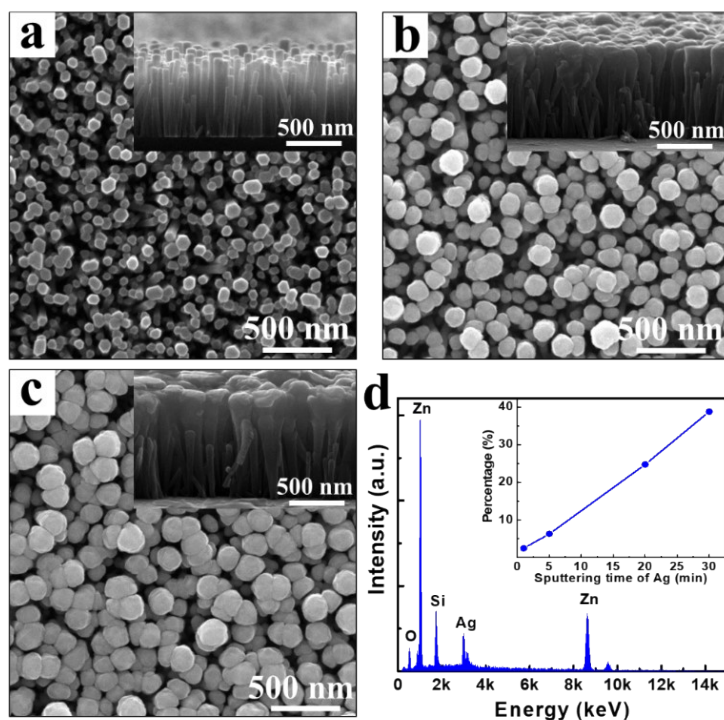

**Figure S1.** SEM images of Ag/ZnO NRs with different Ag deposition duration of (a) 0 min, (b) 20 min, and (c) 30 min. (d) EDS spectrum of Ag/ZnO (insert figure: Ag content in total samples with 1 min, 5 min, 20 min, and 30 min).

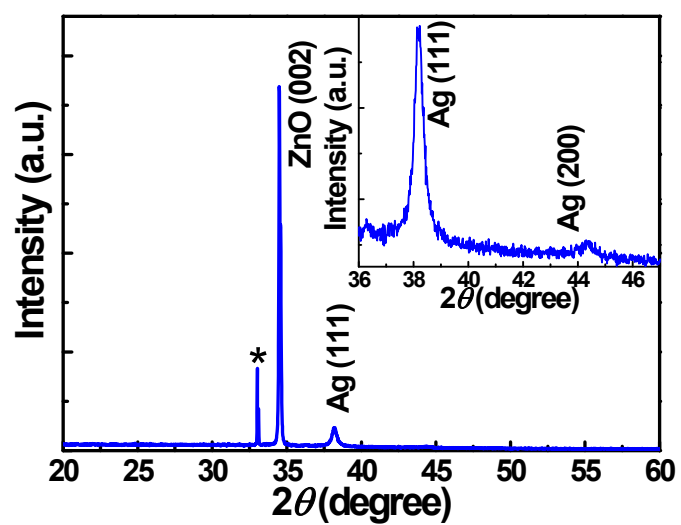

**Figure S2.** XRD patterns of Ag/ZnO with 1min Ag decorated time. The asterisk represents the silicon substrate.

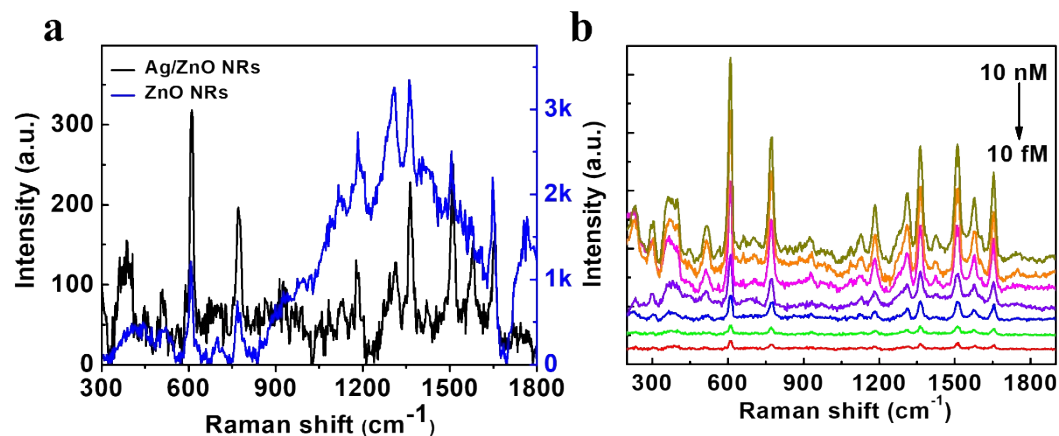

**Figure S3.** (a) Raman spectra of R6G molecules on Ag/ZnO NRs and ZnO NRs. (b) The Raman spectra of R6G dye against concentration obtained from 20 min Ag deposited NRs.

The SERS activity of the Ag/ZnO NRs was estimated by measuring the enhancement factors (EF) of the R6G peak at  $1650\text{ cm}^{-1}$  using the formula:  $EF = (I_{\text{SERS}} / I_{\text{REF}}) \times (C_{\text{REF}} / C_{\text{SERS}})$ . Where  $C_{\text{SERS}}$  is the concentration of R6G molecules on the Ag/ZnO NRs substrate ( $C_{\text{SERS}} = 10\text{ fM}$ ) and  $C_{\text{REF}}$  is the standard Raman spectra of the ZnO NRs substrate ( $C_{\text{REF}} = 10^{-1}\text{ M}$ ). Here, the Raman intensity of Ag/ZnO NRs ( $I_{\text{SERS}}$ ) and ZnO NRs ( $I_{\text{REF}}$ ) are 176 and 2200 units at the peak of  $1650\text{ cm}^{-1}$ , respectively. So, the EF is estimated to be  $8 \times 10^{11}$ .

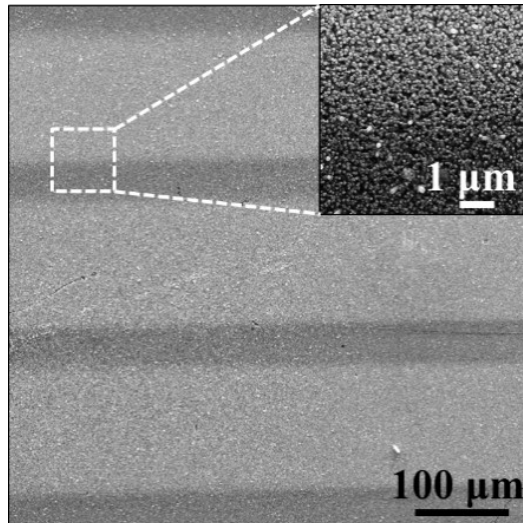

**Figure S4.** SEM images of patterned substrates with alternative Ag/ZnO (flat section) and bare ZnO zone (narrow part), the close-up view on the interfacial regime.

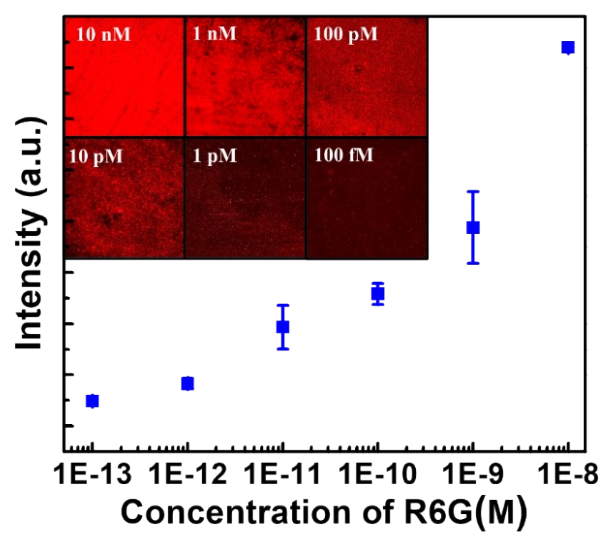

**Figure S5.** The fluorescence images and intensity of R6G dyes with concentration from 100 fM to 10 nM obtained from 20min Ag deposited NRs, respectively.
